# Supplementary material for: Antimony trifluoride-incorporated SnO2 for high-efficiency planar perovskite solar cells
Source: Royal Society of Chemistry journal article supplement (doi:10.1039/d1tc03488j), 2021-01-01
Supplement: d1tc03488j1.pdf [file d1tc03488j1.pdf]

Electronic Supplementary Material (ESI) for Journal of Materials Chemistry C.  
This journal is © The Royal Society of Chemistry 2021

## Supporting Information

### Antimony trifluoride incorporated SnO<sub>2</sub> for high-efficiency planar perovskite solar cells

*Li Zhang, Hui Li\*, Jing Zhuang, Yigang Luan, Sixuan Wu, Guosheng Niu, Liang Chu, Xiaofei Cao, Xing'ao Li\* and Jizheng Wang\**

Li Zhang, Dr. Hui Li, Sixuan Wu, Dr. Liang Chu, Prof. Xing'ao Li  
New Energy Technology Engineering Laboratory of Jiangsu Province, School of Science,  
Nanjing University of Posts and Telecommunications, Nanjing 210023, P. R. China  
Email: lihui1986@njupt.edu.cn, lxahbmy@126.com

Dr. Jing Zhuang, Dr. Yigang Luan, Guosheng Niu, Xiaofei Cao, Prof. Jizheng Wang.  
Beijing National Laboratory for Molecular Sciences, CAS Key Laboratory of Organic Solids,  
Institute of Chemistry, Chinese Academy of Sciences, Beijing 100190, P. R. China  
E-mail: jizheng@iccas.ac.cn

Guosheng Niu, Xiaofei Cao, Prof. Jizheng Wang  
University of Chinese Academy of Sciences, Beijing 100049, P. R. China.  
E-mail: jizheng@iccas.ac.cn

Keywords: Perovskite solar cells, High-performance, Hysteresis, Stability, Tin dioxide

## Experimental Section

### **Materials:**

The SnO<sub>2</sub> colloid precursor was purchased from Alfa Aesar. N, N-dimethylformamide (DMF), dimethyl sulfoxide (DMSO) and chlorobenzene were purchased from Sigma-Aldrich. PbI<sub>2</sub>, FAI, MABr, MAcl, bis(trifluoromethane) sulfonimide lithium salt (Li-TFSI), 4-tertbutylpyridine (TBP) and Spiro-OMeTAD were purchased from Xian Polymer Light Technology Corp. Antimony fluoride (SbF<sub>3</sub>) was purchased from Aladdin.

### ***Solar cells Fabrication:***

The ITO glass substrate (1.78×1.78 cm) was cleaned with deionized water, acetone and isopropanol respectively for 15 minutes. Then the clean substrate was dried by a nitrogen stream, and treated with oxygen plasma for 5 minutes. The SnO<sub>2</sub> colloidal precursor was diluted with ultrapure water (volume ratio 1.2:6.5) to prepare the SnO<sub>2</sub> precursor (marked by SnO<sub>2</sub>). SnO<sub>2</sub> precursors with different SbF<sub>3</sub> concentrations (0.2mg/mL, 0.4mg/mL and 0.6mg/mL) were also prepared (marked by SnO<sub>2</sub>-SbF<sub>3</sub>). The SnO<sub>2</sub> precursors without/with different SbF<sub>3</sub> concentrations were spin-coated on the ITO substrates at a speed of 3000 rpm for 35 s, and then annealed at 150°C for 30 minutes in the air (relative humidity RH=40%). SnO<sub>2</sub> film and SnO<sub>2</sub>-SbF<sub>3</sub> film were consequently obtained. Then the substrate was transferred to a nitrogen glove box to prepare the perovskite film. The perovskite film was prepared by a two-step method. First, 760 mg PbI<sub>2</sub> and 18.2 mg CsI were dissolved in a mixed solvent of DMF (1 mL) and DMSO (160 μL), and then stirred at 60 °C for 15 h. The PbI<sub>2</sub> solution was filtered through a 0.22 μm pore PTFE filter, and then PbI<sub>2</sub> solution was spin-coated on the ETL/ITO substrate at a speed of 1600rpm for 20s and 4000rpm for 30s, respectively. Then the PbI<sub>2</sub> film was annealed at 70°C for 2 minutes. Second, 120 μL of mixed ammonium salt isopropanol solution (110 mg FAI, 11.5 mg MACl and 11 mg MABr dissolved in 1500 μL isopropanol) was spin-coated on the PbI<sub>2</sub> film at a speed of 2000 rpm for 23 s, the perovskite layer was obtained. The perovskite film was then taken out of the glove box and annealed at 140°C for 20 minutes in the air (RH =40%). After annealing, 120 μL isopropanol was used to clean the excess ammonium salt in the perovskite film. Spiro-OMeTAD solution was subsequently spin-coated on the perovskite layer at 4000 rpm for 30 s. After that, the prepared film was placed into a desiccator for 20 hours. Finally, 90 nm Au film was deposited as electrode by thermal evaporation.

### ***Characterization:***

XPS was measured by XPS machine (ESCALAB250XI, Thermo Fisher Scientific). The X-ray diffraction patterns were measured by using a Rigaku-2500 X-ray diffractometer with an X-ray tube (Cu K $\alpha$ ,  $\lambda$  =1.5406 Å). UPS was measured by UPS machine (AXIS ULTRA DLD, Kratos). The UV light source is He I, and the energy of He I is 21.22 eV. The basic

vacuum of the Analytical Chamber is  $3.0 \times 10^{-8}$  Torr, and the bias voltage is -9 V. The top-view and cross-sectional SEM images were attained using a scanning electron microscope (SEM, HITACH2100). EQE was recorded using a Newport Oriel QE-200 (Newport 300 W xenon lamp). All J-V curves were measured using a source meter (Keithley 2420, USA) under AM 1.5 sunlight at an irradiance of  $100 \text{ mW cm}^{-2}$  provided by a solar simulator (Newport, Oriel Sol3A Class AAA, 94043A). The device area was  $0.04 \text{ cm}^2$ . Light intensity was calibrated using a monocrystalline silicon reference cell with a KG5 window (Newport, Oriel 91150). Impedance spectroscopy (IS) was measured by Zennium (Zahner).

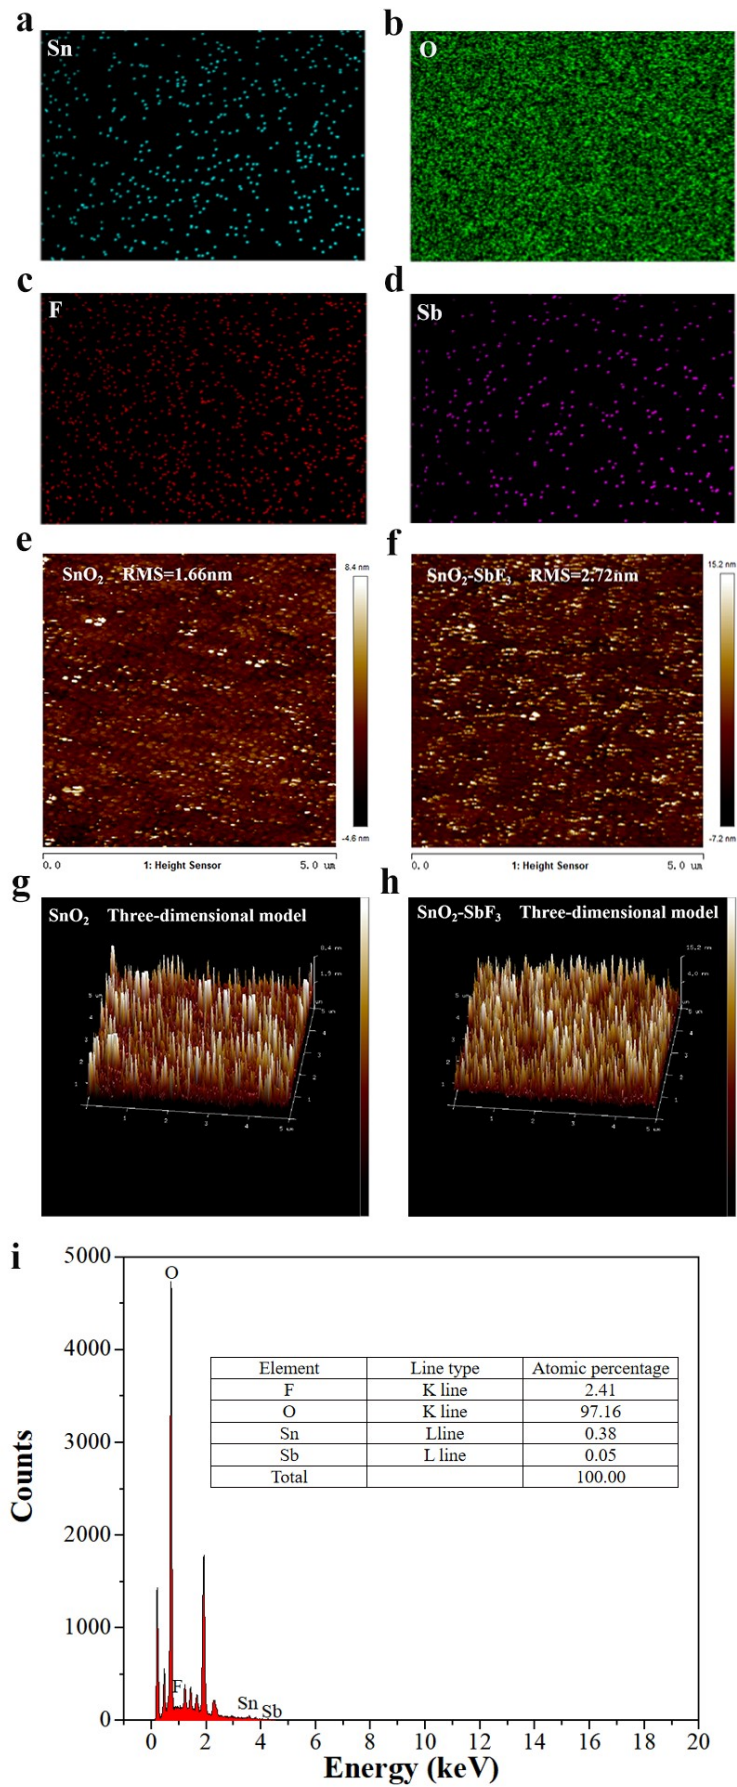

**Figure S1.** (a)-(d) and (i) EDS mappings of the SnO<sub>2</sub>-SbF<sub>3</sub> film on glass, (e)-(h) AFM images of the SnO<sub>2</sub> and SnO<sub>2</sub>-SbF<sub>3</sub> films.

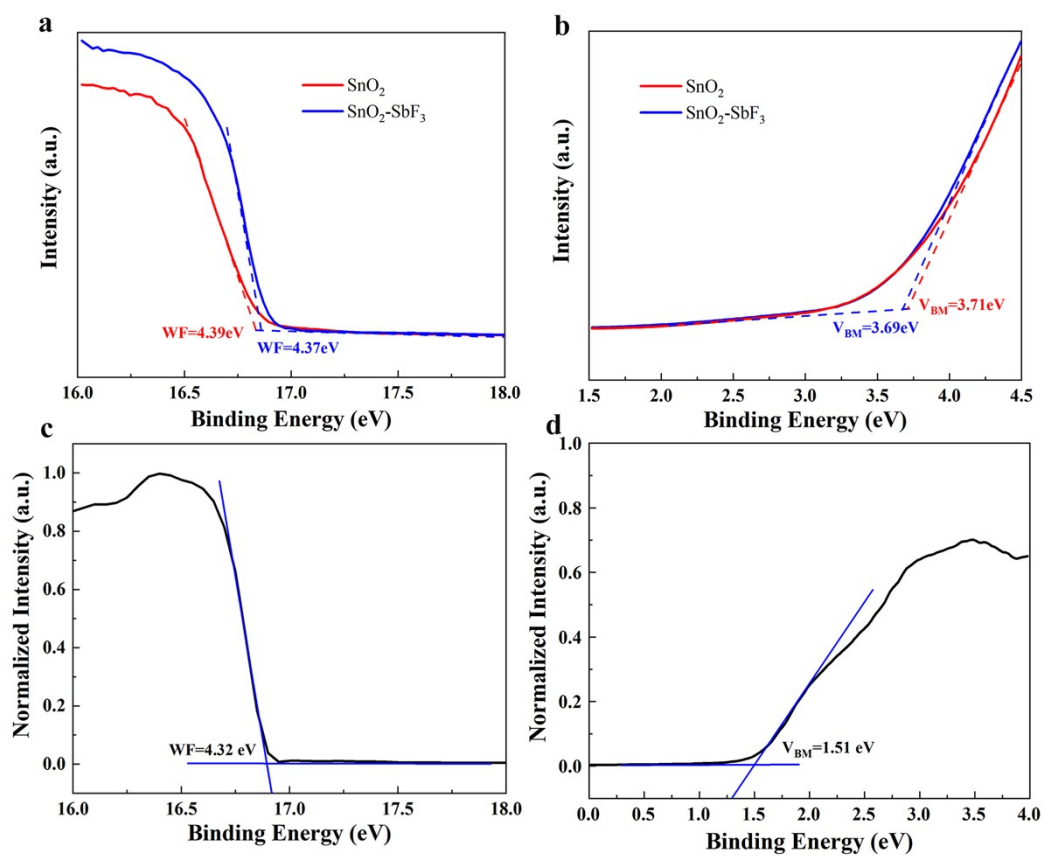

**Figure S2.** (a) UPS cutoff edge and (b) valence band spectrum of SnO<sub>2</sub>, SnO<sub>2</sub>-SbF<sub>3</sub>. (c) UPS cutoff edge and (d) valence band spectra of the perovskite film.

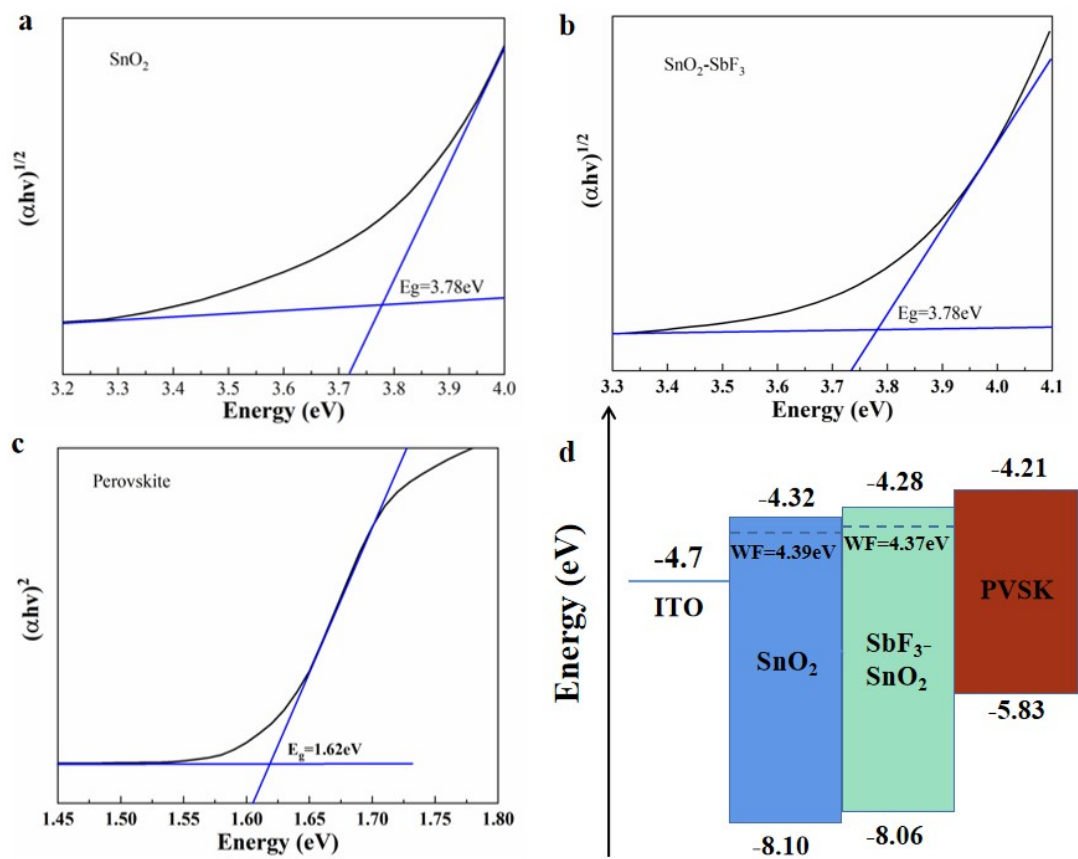

**Figure S3.** (a)-(c) Bandgap measurement and (d) schematic energy-level diagram.

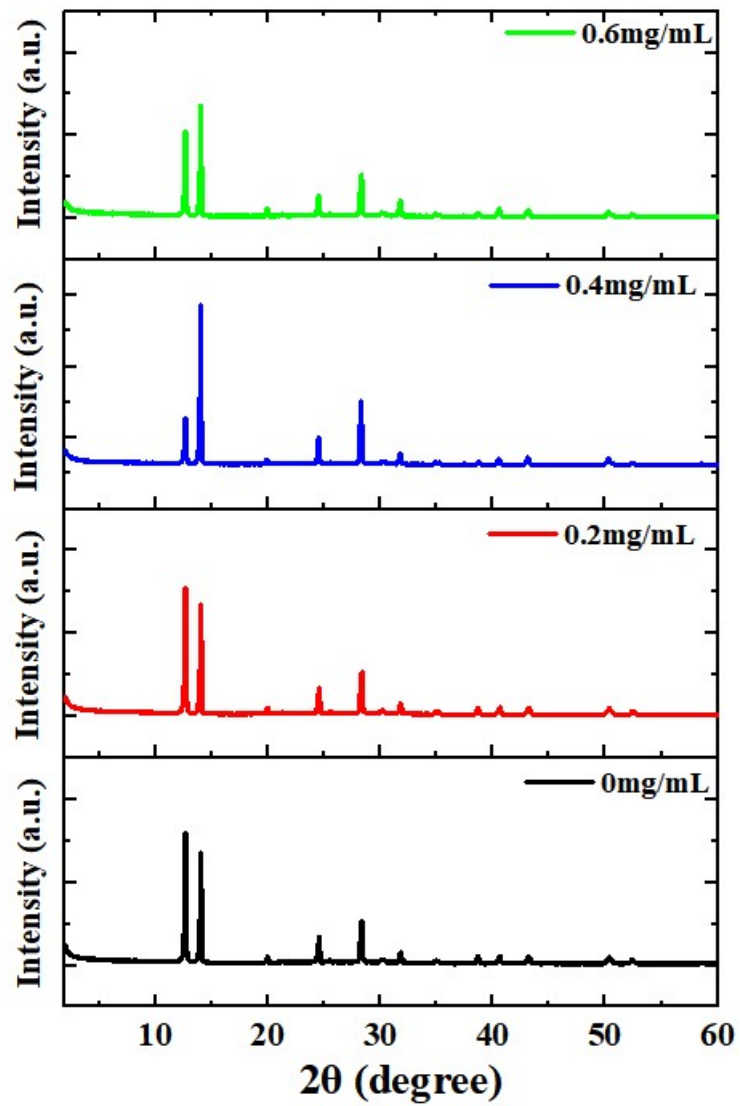

**Figure S4.** XRD patterns of perovskite films deposited on ETL with different  $\text{SbF}_3$  amounts.

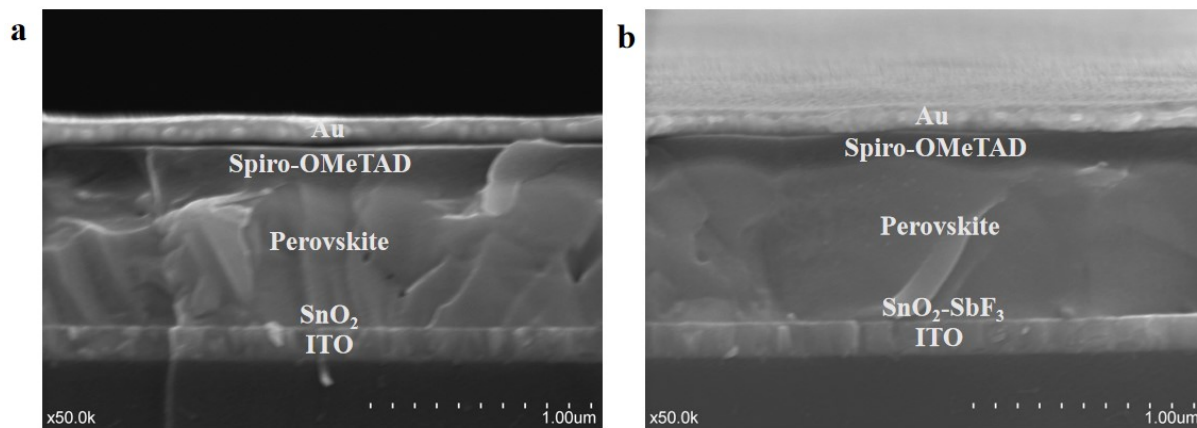

**Figure S5.** Cross-sectional SEM images of devices.

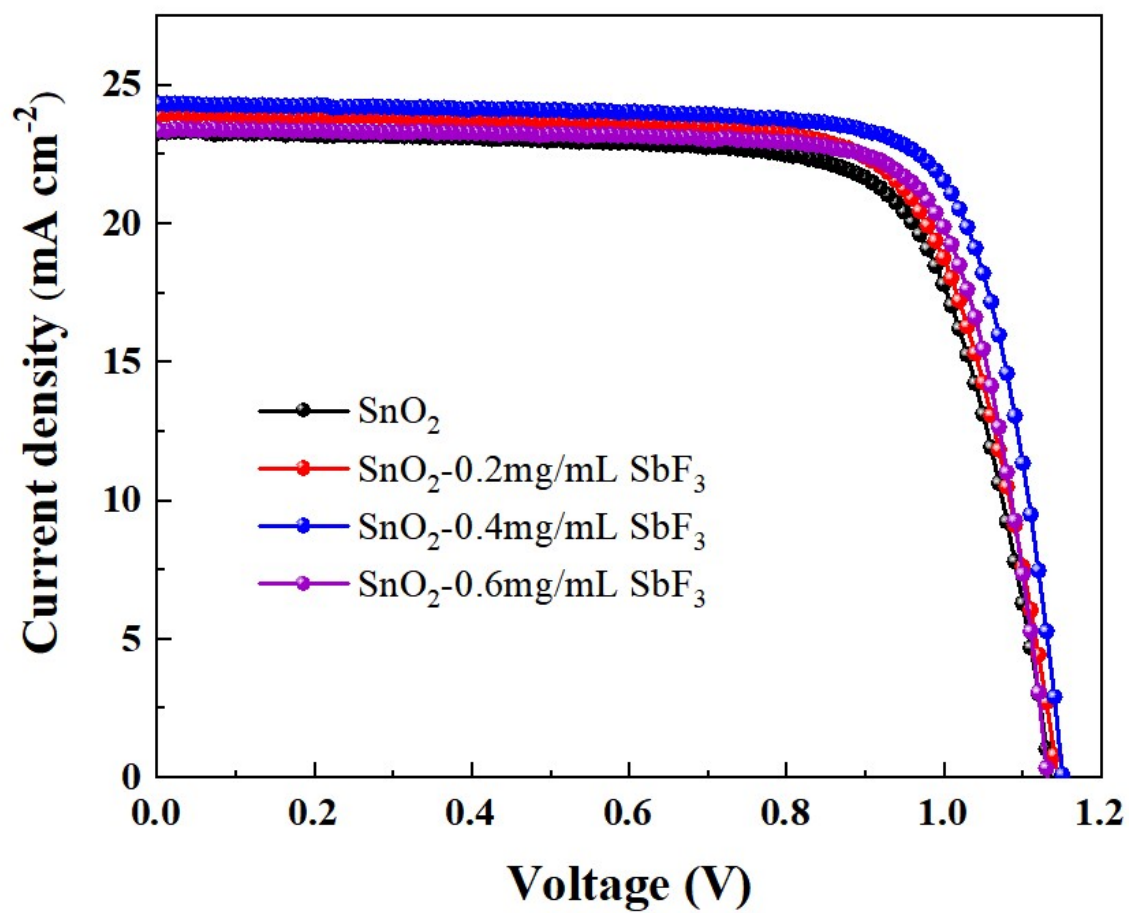

**Figure S6.** J-V curves of SnO<sub>2</sub>-SbF<sub>3</sub> devices with different concentrations of SbF<sub>3</sub> aqueous solution.



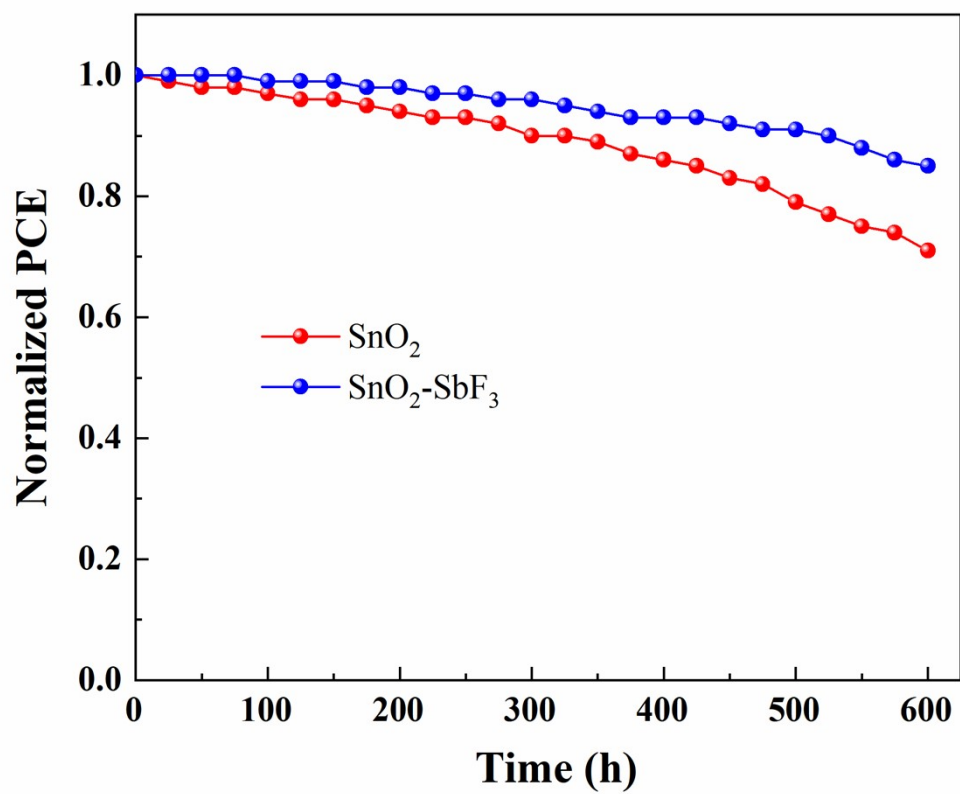

**Figure S7.** The long-term stability of PSCs based on SnO<sub>2</sub> or SnO<sub>2</sub>-SbF<sub>3</sub>.

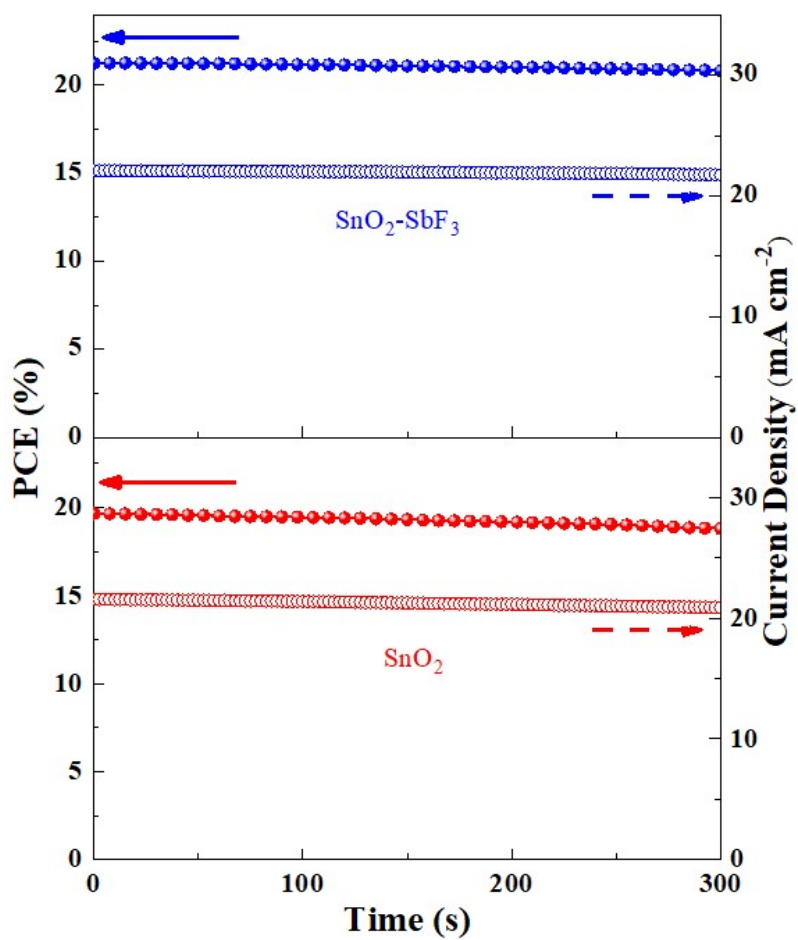

**Figure S8.** MPP tracking for PSCs under continuous AM 1.5 G illumination (The  $V_{\text{MPP}}$  of  $\text{SnO}_2$  device is 0.918 V, and the  $V_{\text{MPP}}$  of  $\text{SnO}_2\text{-SbF}_3$  device is 0.948 V).

The electron mobility of the ETL was determined by using a space charge finite current (SCLC) model with the ITO/Al/ETL/Al structure (ETL was SnO<sub>2</sub> film or SnO<sub>2</sub>-SbF<sub>3</sub> film). Here, we calculate the electron mobility by using the following Equation:<sup>[1]</sup>

$$\mu_e = \frac{8JL^3}{9\varepsilon_0\varepsilon_r(V_{app} - V_r - V_{bi})^2}$$

where  $\mu_e$ ,  $J$ ,  $L$ ,  $\varepsilon_0$ ,  $\varepsilon_r$ ,  $V_{app}$ ,  $V_r$ , and  $V_{bi}$  are electron mobility, current density, thickness of ETL, , vacuum permittivity, relative dielectric constant of ETL, applied voltage, voltage drop and built-in voltage, respectively. The calculated parameters and electron mobility are listed in Table S1 as follows.

**Table S1** The calculated electron mobility of the ETL.

| ETL                                | Mobility [cm <sup>2</sup> V <sup>-1</sup> S <sup>-1</sup> ] | Thickness [nm] |
|------------------------------------|-------------------------------------------------------------|----------------|
| SnO <sub>2</sub>                   | 2.38 × 10 <sup>-4</sup>                                     | 32.7           |
| SnO <sub>2</sub> -SbF <sub>3</sub> | 4.35 × 10 <sup>-4</sup>                                     | 34.8           |

The structures composed of ITO/ETL/Au were fabricated to study the conductivity of ETLs. Figure 2b shows the current-voltage (I-V) characteristic curves. We calculated the conductivity ( $\sigma$ ) using the following Equation:<sup>[2]</sup>

$$\sigma = \frac{Id}{VA}$$

where  $A$  is the area and  $d$  is the thickness of the ETL. The calculated parameters and conductivity are listed in Table S2 as follows.

**Table S2** The calculated electron conductivity of the ETL.

| ETL                                | Slop [I/V] | Thickness [nm] | Conductivity [mScm <sup>-1</sup> ] |
|------------------------------------|------------|----------------|------------------------------------|
| SnO <sub>2</sub>                   | 46.5       | 32.7           | 3.80 × 10 <sup>-3</sup>            |
| SnO <sub>2</sub> -SbF <sub>3</sub> | 59.7       | 34.8           | 5.19 × 10 <sup>-3</sup>            |

The average recombination lifetime was estimated from the TRPL spectra fitted by a bi-exponential decay function, the equation is as follows:<sup>[3]</sup>

$$\tau_{ave} = \frac{\sum A_i \tau_i^2}{\sum A_i \tau_i}$$

where  $\tau_i$  is decay times and  $A_i$  is amplitudes.

**Table S3** Parameters for the TRPL spectra of the perovskite films deposited SnO<sub>2</sub> or SnO<sub>2</sub>-SbF<sub>3</sub>.

| Sample                                             | $\tau_1$ [ns] | A <sub>1</sub> | $\tau_2$ [ns] | A <sub>2</sub> | $\tau_{ave}$ [ns] |
|----------------------------------------------------|---------------|----------------|---------------|----------------|-------------------|
| ITO/SnO <sub>2</sub> /perovskite                   | 77.21         | 194.03         | 276.32        | 152.77         | 224.17            |
| ITO/SnO <sub>2</sub> -SbF <sub>3</sub> /perovskite | 67.04         | 166.43         | 233.54        | 143.75         | 191.98            |

**Table S4** Calculated parameters and trap density (N<sub>t</sub>) of the perovskite films deposited on SnO<sub>2</sub> or SnO<sub>2</sub>-SbF<sub>3</sub>.

| Sample                             | L [nm] | $\epsilon$ | V <sub>TFL</sub> [V] | N <sub>t</sub> [ $\times 10^{15} \text{cm}^{-3}$ ] |
|------------------------------------|--------|------------|----------------------|----------------------------------------------------|
| SnO <sub>2</sub>                   | 720    | 42.3       | 0.626                | 5.65                                               |
| SnO <sub>2</sub> -SbF <sub>3</sub> | 720    | 42.3       | 0.433                | 3.91                                               |

**Table S5** EIS parameters of the SnO<sub>2</sub> and SnO<sub>2</sub>-SbF<sub>3</sub> devices.

| Substrates                         | R <sub>s</sub> [ $\Omega$ ] | R <sub>tr</sub> [k $\Omega$ ] | C <sub>tr</sub> [F] | R <sub>rec</sub> [k $\Omega$ ] | C <sub>rec</sub> [F] |
|------------------------------------|-----------------------------|-------------------------------|---------------------|--------------------------------|----------------------|
| SnO <sub>2</sub>                   | 35.1                        | 54.5                          | 9.416E-10           | 2904.2                         | 5.119E-8             |
| SnO <sub>2</sub> -SbF <sub>3</sub> | 34.3                        | 45.2                          | 1.078E-9            | 3492.3                         | 6.289E-8             |

**Table S6** Parameters of the devices with different SbF<sub>3</sub> concentrations.

| SnO <sub>2</sub> -SbF <sub>3</sub> | V <sub>oc</sub> [V] | J <sub>sc</sub> [mA/cm <sup>2</sup> ] | FF(%) | PCE(%) |
|------------------------------------|---------------------|---------------------------------------|-------|--------|
| 0mg/mL                             | 1.132               | 23.42                                 | 75.03 | 19.89  |
| 0.2mg/mL                           | 1.144               | 23.85                                 | 75.59 | 20.62  |
| 0.4mg/mL                           | 1.146               | 24.24                                 | 77.10 | 21.42  |

---

---

|          |       |       |       |       |
|----------|-------|-------|-------|-------|
| 0.6mg/mL | 1.133 | 23.51 | 75.80 | 20.19 |
|----------|-------|-------|-------|-------|

---

---

## References

- [1] Z. G. Liu, K. M. Deng, J. Hu, and L. Li, *Angew. Chem. Int. Ed.* 2019, 58, 11497-11504.
- [2] J. H. Heo, M. H. Lee, H. J. Han, B. R. Patil, J. S. Yu, and S. H. Im, *J. Mater. Chem. A* 2016, 4, 1572.
- [3] J. Zhuang, P. Mao, Y. G. Luan, X. H. Yi, Z. Y. Tu, Y. Y. Zhang, Y. P. Yi, Y. Z. Wei, N. L. Chen, T. Lin, F. Y. Wang, C. Li, and J. Z. Wang, *ACS Energy Lett.* 2019, 4, 2913.
